# Supplementary material for: Covalent modification of reduced graphene oxide by chiral side-chain liquid crystalline oligomer via Diels–Alder reaction
Source: Royal Society of Chemistry journal article supplement (doi:10.1039/c6ra20891f), 2016-01-01
Supplement: c6ra20891f1.pdf [file c6ra20891f1.pdf]

# Electronic Supplementary Information

## Covalent modification of reduced graphene oxide by chiral side-chain liquid crystalline oligomer via Diels-Alder reaction

Xiaodong Zhang, Yuehua Cong and Baoyan Zhang\*

Centre for Molecular Science and Engineering, Northeastern University, Shenyang, 110819, China

### Synthesis of CSLCO

The liquid crystalline monomer cholesteryl 4-(allyloxy)benzoate ( $M_1$ ) was prepared according to previously reported synthetic method.<sup>1</sup> It showed the following phase transition: Crystalline (112 °C), chiral nematic (240 °C), and isotropic fluid, the detailed chemical parameters of  $M_1$  were as follows, IR (KBr,  $\text{cm}^{-1}$ ): 3057(=CH), 2971-2860(-CH<sub>3</sub>, -CH<sub>2</sub>-), 1703(C=O), 1645 (C=C), 1604, 1493(Ar-), 1271, 1173 (C-O-C). <sup>1</sup>H NMR (600 MHz, CDCl<sub>3</sub>,  $\delta$ ): 7.99-7.98 (d, 2H, Ar-H), 6.92 (d, 2H, Ar-H), 6.05 (m, 1H, CH<sub>2</sub>=CH-), 5.44-5.41 (t, 2H, CH<sub>2</sub>=CH-), 5.32-5.31 (m, 1H, =CH- in cholesteryl), 4.59-4.58 (d, 2H, -OCH<sub>2</sub>-), 2.03-0.67 (m, 44H, cholesteryl-H). 4-(10-undecen-1-yloxy) benzoic acid ( $M_2$ ) was synthesized according to reference,<sup>2</sup> the detailed chemical parameters of  $M_2$  were as follows, (mp=128 °C). IR (KBr,  $\text{cm}^{-1}$ ): 3080(=CH); 2930, 2852(-CH<sub>2</sub>-); 2678, 2557(COOH); 1754,1684(C=O); 1641(C=C);1602,1508(Ar-).4'-hydroxy-[1,1'-biphenyl]-4-yl4-(undec-10-enyloxy)benzoate ( $M_3$ ) was synthesized according to reference,<sup>3,4</sup> Crystalline (173 °C), nematic (207 °C), and isotropic fluid, the detailed chemical parameters of  $M_3$  were as follows, IR (KBr,  $\text{cm}^{-1}$ ): 3412 (-OH), 2921, 2849 (-CH<sub>2</sub>-), 1754, 1695 (C=O), 1642 (C=C), 1602, 1508 (Ar-). <sup>1</sup>H NMR (600 MHz, CDCl<sub>3</sub>,  $\delta$ ): 1.29-1.36 (10H, m, CH<sub>2</sub>=CHCH<sub>2</sub>(CH<sub>2</sub>)<sub>5</sub>-); 1.73-1.78 (2H, m, -CH<sub>2</sub>CH<sub>2</sub>COO-); 2.02-2.06 (2H, m, CH<sub>2</sub>=CHCH<sub>2</sub>-); 2.37-2.60 (2H, m, -CH<sub>2</sub>CH<sub>2</sub>COO-); 4.85-5.02 (2H, m, CH<sub>2</sub>=CH-); 5.13 (s, 1H, -OH); 5.77-5.86 (1H, m, CH<sub>2</sub>=CH-); 6.84-8.26 (12H, m, Ar-H). CSLCO was synthesized according to reference.<sup>5</sup>  $M_1$ ,  $M_2$  and  $M_3$  were added to polymethylhydrogensiloxane (PMHS, Aldrich). After the addition of platinum

catalyst, the polymerization was carried out at 80 °C under nitrogen protection with magnetic stirring until the infrared spectra showed no Si-H absorption peak at 2166cm<sup>-1</sup>.<sup>6</sup> The polymer solution was dried over anhydrous magnesium sulfate and filtered, then, furoyl chloride was dissolved in tetrahydrofuran (THF) and added dropwise to the solution of polymers at 25 °C. The mixture was stirred at room temperature under dry air for 3 h, then heated to 65 °C and kept for 10 h in an oil bath to ensure that the reaction finished. The solution was poured into a beaker filled with 100mL of methanol, the crude product was obtained by filtration and recrystallized from ethanol.<sup>7</sup> The chiral side-chain liquid crystalline oligomer (CSLCO) was obtained.

## Diels-Alder Reaction

The forward reaction leads to the formation of a six-membered ring via simultaneous creation of two new  $\sigma$ -bonds and one new  $\pi$ -bond and the loss of three  $\pi$ -bonds; alternatively, the process may be viewed as a change in hybridization in which four  $sp^2$  carbon atoms become  $sp^3$  hybridized.<sup>8</sup>

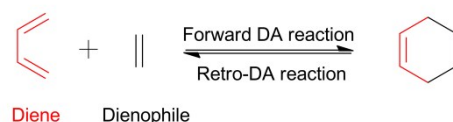

**SCHEME 1.** Schematic representation of the Diels-Alder reaction between a Diene (1,3-Butadiene) and Dienophile (Ethylene), illustrating the Diels-Alder cycloaddition and cycloreversion reactions in their simplest form

## Canonical Resonance Structures of Graphene

In contrast to fullerene and carbon nanotubes, which always act as the dienophile in [4 + 2] cycloaddition due to their curvatures, 2-dimensional graphene and its derivatives are able to behave as both diene and dienophile.<sup>9,10</sup>

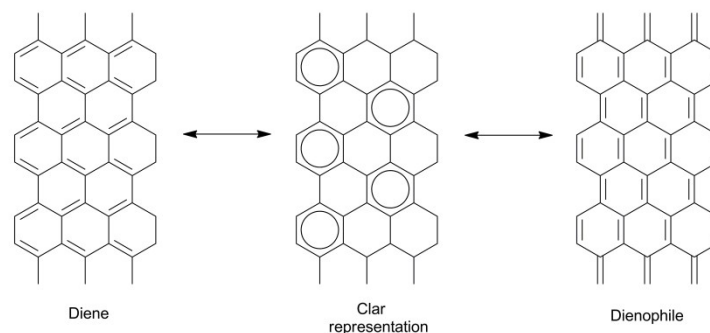

**Scheme 2.** Resonance Forms of Graphene: Graphene as Diene and Dienophile

## The reasons for the necessary of $M_1$ and $M_2$

The reasons for using  $M_1$  are that  $M_1$  has wide liquid crystalline range (from 112 °C to 240 °C) and the chemical structure possesses high stability for lack of reactive functional groups. The extra spacer in  $M_1$  is used to broaden the liquid crystalline range of  $M_1$ . The reasons for using  $M_2$  are as following, There is long hydrocarbon chain in the molecular structure of  $M_2$  compared with  $M_1$ , the main purpose of using  $M_2$  is to bring some flexibility to CSLCO. Meanwhile,  $M_2$  has carboxyl group, which makes  $R_2$  have good compatibility. Based on the above analysis, both  $M_1$  and  $M_2$  are necessary in this study.

## REFERENCES

- 1 F. Meng, B. Zhang, L. Liu and B. Zang, *Polymer*, 2003, **44**, 3935-3943.
- 2 F. B. Meng, Y. M. Gao, J. Lian, B. Y. Zhang and F. Z. Zhang, *Colloid and Polymer Science*, 2008, **286**, 873-879.
- 3 B. Y. Zhang, J. S. Hu, L. Q. Yang, X. Z. He and C. Liu, *European polymer journal*, 2007, **43**, 2017-2027.
- 4 F. B. Meng, Y. Cui, H. B. Chen, B. Y. Zhang and C. Jia, *Polymer*, 2009, **50**, 1187-1196.
- 5 F. B. Meng, X. D. Zhang, X. Z. He, H. Lu, Y. Ma, H. L. Han and B. Y. Zhang, *Polymer*, 2011, **52**, 5075-5084.
- 6 S. Lu, M. M. Melo, J. Zhao, E. M. Pearce and T. Kwei, *Macromolecules*, 1995, **28**, 4908-4913.
- 7 B. Y. Zhang, J. S. Hu, S. C. Ren and C. Liu, *Journal of Applied Polymer Science*, 2009, **111**, 3016-3025.
- 8 R. Haddon and S. Y. Chow, *Journal of the American Chemical Society*, 1998, **120**, 10494-10496.

- 9 S. Sarkar, E. Bekyarova, S. Niyogi and R. C. Haddon, *Journal of the American Chemical Society*, 2011, **133**, 3324-3327.
- 10 S. Sarkar, E. Bekyarova and R. C. Haddon, *Accounts of chemical research*, 2012, **45**, 673-682.
